# Supplementary material for: Dietary Induction and Modulation of Ferroptosis in Caenorhabditis elegans
Source: bioRxiv or medRxiv preprint supplement (doi:10.1101/772079), 2019-09-17
Supplement: Supplementary file [file media-1.pdf]

Supplementary Table 1

Sterility Data and DGLA update data relating to Figures 1 and 2

N= number of plates of 50 worms each

Data for Figure 1A

| Treatment (WT)            | % Sterility | % DGLA in worm lipids | N |
|---------------------------|-------------|-----------------------|---|
| 0mM DGLA / DMSO           | 0%          | 3.57%                 | 6 |
| 0mM DGLA / 125µM Fer-1    | 0%          | 3.49%                 | 6 |
| 0mM DGLA / 250µM Fer-1    | 0%          | 3.66%                 | 6 |
| 0.1mM DGLA / DMSO         | 52%         | 7.96%                 | 6 |
| 0.1mM DGLA / 125µM Fer-1  | 23%         | 8.40%                 | 6 |
| 0.1mM DGLA / 250µM Fer-1  | 15%         | 8.51%                 | 6 |
| 0.13mM DGLA / DMSO        | 75%         | 9.55%                 | 6 |
| 0.13mM DGLA / 125µM Fer-1 | 38%         | 10.44%                | 6 |
| 0.13mM DGLA / 250µM Fer-1 | 32%         | 10.48%                | 6 |

| Treatment ( <i>ced-3</i> ) | % Sterility | % DGLA in worm lipids | N |
|----------------------------|-------------|-----------------------|---|
| 0mM DGLA / DMSO            | 0%          | 3.62%                 | 6 |
| 0mM DGLA / 125µM Fer-1     | 0%          | 3.67%                 | 6 |
| 0mM DGLA / 250µM Fer-1     | 0%          | 3.75%                 | 6 |
| 0.1mM DGLA / DMSO          | 26%         | 8.75%                 | 6 |
| 0.1mM DGLA / 125µM Fer-1   | 3%          | 9.90%                 | 6 |
| 0.1mM DGLA / 250µM Fer-1   | 1%          | 8.72%                 | 6 |
| 0.13mM DGLA / DMSO         | 42%         | 10.73%                | 6 |
| 0.13mM DGLA / 125µM Fer-1  | 16%         | 11.17%                | 6 |
| 0.13mM DGLA / 250µM Fer-1  | 6%          | 10.96%                | 6 |

Data for Figure 1D

| Treatment (WT)             | % Sterility | % DGLA in worm lipids | N |
|----------------------------|-------------|-----------------------|---|
| 0mM DGLA / DMSO (0.5)      | 0%          | 5.54%                 | 5 |
| 0mM DGLA / DMSO (1)        | 0%          | 4.50%                 | 5 |
| 0mM DGLA / 0.5mM Trolox    | 0%          | 4.41%                 | 5 |
| 0mM DGLA / 1mM Trolox      | 0%          | 4.22%                 | 5 |
| 0.1mM DGLA / DMSO (0.5)    | 12%         | 9.53%                 | 5 |
| 0.1mM DGLA / DMSO (1)      | 13%         | 8.60%                 | 5 |
| 0.1mM DGLA / 0.5mM Trolox  | 0%          | 8.30%                 | 5 |
| 0.1mM DGLA / 1mM Trolox    | 0%          | 8.82%                 | 5 |
| 0.15mM DGLA / DMSO (0.5)   | 67%         | 9.41%                 | 5 |
| 0.15mM DGLA / DMSO (1)     | 71.2%       | 10.09%                | 5 |
| 0.15mM DGLA / 0.5mM Trolox | 37.2%       | 9.44%                 | 5 |
| 0.15mM DGLA / 1mM Trolox   | 25.2%       | 9.49%                 | 5 |

Data for Figure 1G

| Treatment               | % Sterility | % DGLA in worm lipids | N |
|-------------------------|-------------|-----------------------|---|
| 0mM DGLA N2             | 0.0%        | 3.67%                 | 5 |
| 0mM DGLA bli-3(e767)    | 0.0%        | 3.27%                 | 5 |
| 0mM DGLA bli-3(im10)    | 0.0%        | 3.49%                 | 5 |
| 0.15mM DGLA N2          | 62.4%       | 8.33%                 | 5 |
| 0.15mM DGLA bli-3(e767) | 7.2%        | 11.47%                | 5 |
| 0.15mM DGLA bli-3(im10) | 4.4%        | 11.66%                | 5 |
| 0.3mM DGLA N2           | 90.8%       | 14.05%                | 5 |
| 0.3mM DGLA bli-3(e767)  | 15.2%       | 17.40%                | 5 |
| 0.3mM DGLA bli-3(im10)  | 9.2%        | 15.35%                | 5 |

Data for Figure 1F

| Treatment        | % Sterility | % DGLA in worm lipids | N |
|------------------|-------------|-----------------------|---|
| 0mM DGLA EV      | 0.0%        | 4.33%                 | 5 |
| 0mM DGLA gpx-1   | 0.0%        | 3.78%                 | 5 |
| 0mM DGLA gpx-6   | 0.0%        | 4.03%                 | 5 |
| 0mM DGLA gpx-7   | 0.0%        | 3.73%                 | 5 |
| 0.2mM DGLA EV    | 24.8%       | 10.24%                | 5 |
| 0.2mM DGLA gpx-1 | 92.0%       | 9.59%                 | 5 |
| 0.2mM DGLA gpx-6 | 82.0%       | 9.69%                 | 5 |
| 0.2mM DGLA gpx-7 | 98.0%       | 9.52%                 | 5 |
| 0.4mM DGLA EV    | 73.6%       | 11.34%                | 5 |
| 0.4mM DGLA gpx-1 | 98.8%       | 11.91%                | 5 |
| 0.4mM DGLA gpx-6 | 100.0%      | 10.63%                | 5 |
| 0.4mM DGLA gpx-7 | 98.4%       | 10.12%                | 5 |

Data for Figure 1H

| Treatment              | % Sterility | % DGLA in worm lipids | N |
|------------------------|-------------|-----------------------|---|
| 0mM DGLA N2 DMSO       | 0.0%        | 3.81%                 | 6 |
| 0mM DGLA ftn-1 DMSO    | 0.0%        | 3.80%                 | 6 |
| 0mM DGLA N2 75BP       | 0.0%        | 6.87%                 | 6 |
| 0mM DGLA ftn-1 75BP    | 0.0%        | 9.31%                 | 6 |
| 0.1mM DGLA N2 DMSO     | 49.3%       | 8.87%                 | 6 |
| 0.1mM DGLA ftn-1 DMSO  | 70.0%       | 9.09%                 | 6 |
| 0.1mM DGLA N2 75BP     | 5.3%        | 15.79%                | 6 |
| 0.1mM DGLA ftn-1 75BP  | 29.3%       | 14.33%                | 6 |
| 0.15mM DGLA N2 DMSO    | 76.0%       | 12.08%                | 6 |
| 0.15mM DGLA ftn-1 DMSO | 88.7%       | 10.77%                | 6 |
| 0.15mM DGLA N2 75BP    | 18.0%       | 15.78%                | 6 |
| 0.15mM DGLA ftn-1 75BP | 33.3%       | 19.49%                | 6 |

Data for Figure 2C

| Treatment         | % Sterility | % DGLA in worm lipids | N |
|-------------------|-------------|-----------------------|---|
| 0mM DGLA N2       | 0.0%        | 3.81%                 | 5 |
| 0mM DGLA ads-1    | 0.0%        | 4.40%                 | 5 |
| 0.1mM DGLA N2     | 44.4%       | 9.55%                 | 5 |
| 0.1mM DGLA ads-1  | 92.0%       | 7.58%                 | 5 |
| 0.15mM DGLA N2    | 68.8%       | 11.94%                | 5 |
| 0.15mM DGLA ads-1 | 98.0%       | 8.74%                 | 5 |

Data for Figure 2D

| Treatment                      | % Sterility | % DGLA in worm lipids | N |
|--------------------------------|-------------|-----------------------|---|
| 0mM DGLA/DMSO N2               | 0.0%        | 3.87%                 | 5 |
| 0mM DGLA/DMSO ads-1            | 0.0%        | 3.63%                 | 5 |
| 0.05mM DGLA/DMSO N2            | 0.4%        | 6.79%                 | 5 |
| 0.05mM DGLA/125uM Fer-1 N2     | 0.0%        | 6.80%                 | 5 |
| 0.05mM DGLA/250uM Fer-1 N2     | 0.0%        | 6.81%                 | 5 |
| 0.05mM DGLA/DMSO ads-1         | 64.4%       | 4.54%                 | 5 |
| 0.05mM DGLA/125uM Fer-1 ads-1  | 48.4%       | 4.70%                 | 5 |
| 0.05mM DGLA/250uM Fer-1 ads-1  | 29.2%       | 4.67%                 | 5 |
| 0.075mM DGLA/DMSO N2           | 6.8%        | 7.83%                 | 5 |
| 0.075mM DGLA/125uM Fer-1 N2    | 1.6%        | 7.32%                 | 5 |
| 0.075mM DGLA/250uM Fer-1 N2    | 0.8%        | 7.55%                 | 5 |
| 0.075mM DGLA/DMSO ads-1        | 80.8%       | 4.92%                 | 5 |
| 0.075mM DGLA/125uM Fer-1 ads-1 | 67.6%       | 5.03%                 | 5 |
| 0.075mM DGLA/250uM Fer-1 ads-1 | 59.6%       | 5.20%                 | 5 |
