# Supplementary material for: Dietary Induction and Modulation of Ferroptosis in Caenorhabditis elegans
Source: bioRxiv or medRxiv preprint supplement (doi:10.1101/772079), 2019-09-17
Supplement: Supplementary file [file media-2.pdf]

Supplementary Table 2  
GC/MS data of fatty acid composition relating to Figure 2

Data for Figure 2A, 2B, and 2C

| Treatment                 | % Sterility | N | 14:0  | 15:iso | 16:0  | 17:iso | 16:1  | 17Δ    | 18:0  | 18:1n-9 | 18:1n-7 | 18:2  | 19Δ    | 20:3   | 20:4  | 20:4n-3 | 20:5   |
|---------------------------|-------------|---|-------|--------|-------|--------|-------|--------|-------|---------|---------|-------|--------|--------|-------|---------|--------|
| 0mM DGLA/0mM OA N2        | 0.0%        | 5 | 0.98% | 3.06%  | 3.86% | 2.45%  | 1.01% | 17.38% | 4.96% | 3.22%   | 11.54%  | 3.64% | 24.86% | 3.76%  | 0.74% | 5.01%   | 10.97% |
| 0mM DGLA/0.1mM OA N2      | 0.0%        | 5 | 0.82% | 3.50%  | 4.18% | 3.37%  | 1.40% | 10.51% | 5.41% | 6.09%   | 11.10%  | 4.69% | 23.85% | 3.84%  | 0.77% | 5.79%   | 11.76% |
| 0mM DGLA/0.2mM OA N2      | 0.0%        | 5 | 0.76% | 3.67%  | 4.00% | 3.63%  | 1.40% | 8.53%  | 5.22% | 7.11%   | 10.28%  | 4.91% | 25.70% | 3.76%  | 0.68% | 5.67%   | 11.82% |
| 0mM DGLA/0.3mM OA N2      | 0.0%        | 5 | 0.75% | 3.75%  | 3.89% | 3.91%  | 1.34% | 6.61%  | 5.46% | 8.47%   | 9.91%   | 5.10% | 25.55% | 3.65%  | 0.66% | 5.93%   | 12.20% |
| 0.1mM DGLA/0mM OA N2      | 44.4%       | 5 | 1.64% | 3.49%  | 4.61% | 1.97%  | 2.09% | 9.61%  | 5.67% | 4.79%   | 7.51%   | 5.29% | 28.82% | 6.60%  | 0.85% | 6.52%   | 8.32%  |
| 0.1mM DGLA/0.1mM OA N2    | 0.0%        | 5 | 1.10% | 4.44%  | 4.99% | 3.75%  | 1.68% | 9.53%  | 6.38% | 5.71%   | 10.76%  | 5.05% | 15.49% | 5.86%  | 0.90% | 7.61%   | 13.52% |
| 0.1mM DGLA/0.2mM OA N2    | 0.0%        | 5 | 0.86% | 3.93%  | 4.20% | 3.67%  | 1.40% | 7.13%  | 5.54% | 5.73%   | 8.73%   | 5.27% | 26.77% | 4.96%  | 0.69% | 6.41%   | 11.75% |
| 0.1mM DGLA/0.3mM OA N2    | 0.0%        | 5 | 0.81% | 4.01%  | 3.93% | 3.82%  | 1.42% | 6.70%  | 5.18% | 6.50%   | 8.52%   | 5.17% | 26.72% | 4.54%  | 0.68% | 6.85%   | 12.34% |
| 0.2mM DGLA/0mM OA N2      | 66.8%       | 5 | 2.01% | 3.61%  | 5.01% | 1.79%  | 2.51% | 7.75%  | 6.76% | 4.87%   | 6.60%   | 5.91% | 20.49% | 11.34% | 1.15% | 9.17%   | 8.59%  |
| 0.2mM DGLA/0.1mM OA N2    | 0.0%        | 5 | 0.95% | 3.78%  | 4.57% | 3.29%  | 1.58% | 8.07%  | 5.40% | 4.91%   | 8.36%   | 5.65% | 24.72% | 6.64%  | 0.79% | 7.38%   | 10.91% |
| 0.2mM DGLA/0.2mM OA N2    | 0.0%        | 5 | 0.84% | 3.93%  | 4.24% | 3.52%  | 1.53% | 7.20%  | 5.16% | 5.68%   | 8.07%   | 5.25% | 27.46% | 5.94%  | 0.70% | 6.98%   | 10.81% |
| 0.2mM DGLA/0.3mM OA N2    | 0.0%        | 5 | 0.78% | 4.04%  | 4.10% | 3.82%  | 1.49% | 6.42%  | 5.39% | 6.72%   | 8.13%   | 6.77% | 26.20% | 5.75%  | 0.74% | 6.57%   | 10.33% |
| 0.3mM DGLA/0mM OA N2      | 94.8%       | 5 | 2.01% | 3.59%  | 5.12% | 1.68%  | 2.44% | 7.49%  | 6.71% | 4.87%   | 5.97%   | 5.16% | 22.36% | 13.48% | 1.09% | 8.80%   | 6.95%  |
| 0.3mM DGLA/0.1mM OA N2    | 13.2%       | 5 | 0.99% | 3.87%  | 4.46% | 3.08%  | 1.83% | 7.96%  | 5.40% | 5.08%   | 7.89%   | 6.41% | 22.24% | 8.55%  | 0.86% | 8.46%   | 10.04% |
| 0.3mM DGLA/0.2mM OA N2    | 2.4%        | 5 | 0.85% | 3.84%  | 4.29% | 3.38%  | 1.54% | 6.41%  | 5.54% | 5.37%   | 7.41%   | 6.03% | 25.24% | 7.65%  | 0.74% | 8.34%   | 10.48% |
| 0.3mM DGLA/0.3mM OA N2    | 1.6%        | 5 | 0.79% | 3.94%  | 4.10% | 3.61%  | 1.50% | 5.88%  | 5.40% | 5.87%   | 7.27%   | 6.59% | 25.42% | 7.59%  | 0.71% | 8.24%   | 10.31% |
| 0mM DGLA/0mM OA fat-2     | 25.2%       | 5 | 0.88% | 2.81%  | 1.78% | 4.50%  | 3.69% | 17.89% | 2.14% | 20.56%  | 24.20%  | -     | 18.12% | -      | -     | -       | 1.14%  |
| 0mM DGLA/0.1mM OA fat-2   | 36.0%       | 5 | 0.79% | 3.03%  | 1.69% | 5.27%  | 3.76% | 11.39% | 2.12% | 23.46%  | 24.22%  | -     | 21.01% | -      | -     | -       | 1.06%  |
| 0mM DGLA/0.2mM OA fat-2   | 41.2%       | 5 | 0.79% | 3.08%  | 1.68% | 5.50%  | 3.60% | 9.67%  | 2.06% | 24.14%  | 23.46%  | -     | 23.10% | -      | -     | -       | 1.02%  |
| 0mM DGLA/0.3OA fat-2      | 50.0%       | 5 | 0.78% | 3.11%  | 1.60% | 5.64%  | 3.44% | 8.12%  | 2.06% | 25.20%  | 23.15%  | -     | 23.65% | -      | -     | -       | 1.19%  |
| 0.1mM DGLA/0mM OA fat-2   | 3.2%        | 5 | 1.15% | 4.23%  | 4.07% | 2.83%  | 1.86% | 11.37% | 5.90% | 20.23%  | 9.23%   | -     | 18.21% | 4.79%  | 0.93% | 4.15%   | 8.86%  |
| 0.1mM DGLA/0.1mM OA fat-2 | 0.0%        | 5 | 0.95% | 3.62%  | 2.13% | 4.46%  | 3.04% | 8.00%  | 3.08% | 23.28%  | 18.12%  | -     | 24.24% | 0.91%  | 0.19% | 1.59%   | 4.60%  |
| 0.1mM DGLA/0.2mM OA fat-2 | 0.0%        | 5 | 0.93% | 3.57%  | 1.81% | 5.02%  | 3.21% | 7.32%  | 2.59% | 24.09%  | 20.13%  | -     | 24.32% | 0.68%  | 0.00% | 1.03%   | 3.48%  |
| 0.1mM DGLA/0.3mM OA fat-2 | 0.0%        | 5 | 0.98% | 3.88%  | 1.93% | 5.84%  | 3.49% | 5.60%  | 3.38% | 26.91%  | 22.46%  | -     | 20.12% | 0.58%  | 0.29% | 0.86%   | 2.11%  |
| 0.2mM DGLA/0mM OA fat-2   | 0.0%        | 5 | 1.09% | 4.05%  | 4.12% | 2.47%  | 1.76% | 10.11% | 5.92% | 17.78%  | 8.17%   | -     | 16.80% | 8.93%  | 1.34% | 5.52%   | 9.87%  |
| 0.2mM DGLA/0.1mM OA fat-2 | 0.0%        | 5 | 0.88% | 3.92%  | 3.02% | 3.75%  | 2.25% | 8.75%  | 4.48% | 23.93%  | 11.75%  | -     | 24.64% | 1.95%  | 0.41% | 2.29%   | 6.05%  |
| 0.2mM DGLA/0.2mM OA fat-2 | 48.0%       | 5 | 0.89% | 3.62%  | 2.44% | 4.15%  | 2.55% | 7.35%  | 3.88% | 23.46%  | 15.04%  | -     | 24.87% | 1.43%  | 0.35% | 2.13%   | 6.07%  |
| 0.2mM DGLA/0.3mM OA fat-2 | 68.8%       | 5 | 0.88% | 3.77%  | 1.96% | 4.75%  | 2.86% | 6.71%  | 2.93% | 24.78%  | 17.26%  | -     | 24.68% | 1.04%  | 0.25% | 1.73%   | 4.79%  |
| 0.3mM DGLA/0mM OA fat-2   | 0.8%        | 5 | 1.01% | 3.90%  | 4.14% | 2.33%  | 1.73% | 9.15%  | 6.03% | 15.63%  | 7.39%   | -     | 14.92% | 13.59% | 1.61% | 6.85%   | 9.73%  |
| 0.3mM DGLA/0.1mM OA fat-2 | 0.0%        | 5 | 0.97% | 3.88%  | 3.60% | 3.30%  | 1.96% | 7.99%  | 5.20% | 21.93%  | 9.11%   | -     | 21.73% | 4.49%  | 0.82% | 4.29%   | 9.04%  |
| 0.3mM DGLA/0.2mM OA fat-2 | 0.0%        | 5 | 0.83% | 3.68%  | 3.34% | 3.66%  | 1.84% | 6.97%  | 5.17% | 24.37%  | 9.67%   | -     | 24.64% | 3.21%  | 0.64% | 3.24%   | 7.31%  |
| 0.3mM DGLA/0.3mM OA fat-2 | 0.0%        | 5 | 0.79% | 4.12%  | 3.10% | 3.77%  | 1.77% | 6.72%  | 4.97% | 24.98%  | 9.62%   | -     | 24.93% | 2.97%  | 0.50% | 2.97%   | 7.22%  |

**abbreviations**

fatty acid nomenclature x:y(n-z) x= # of carbons, y= # of double bonds, n-z = location of terminal double bonds, z carbons from the methyl end

- 15:iso 13-methyltetradecanoic acid
- 17:iso 15-methylhexanoic acid
- 17Δ cis-9,10-methylenehexadecanoic acid
- 19Δ cis-11,12-methylene octadecanoic acid
- not detected (<0.25%)
